# Supplementary material for: Machine Learning Analysis of Image Data Based on Detailed MR Image Reports for Nasopharyngeal Carcinoma Prognosis
Source: Hindawi journal article supplement (doi:10.1155/2020/8068913), 2020-01-01
Supplement: f1 [file 8068913.f1.zip]

```

#automl parameter
#train for 10 folds CV , running two hour for all OS/DMFS/LRFS
#then get a list order by mean AUC of 10 folds CV
#find the best one

#Automl running
m4 <- h2o.automl(x = c(1:tempX), y = y, training_frame =
deepTrain2,leaderboard_frame=deepTrain2,validation_frame =deepTrain2,

                max_runtime_secs=7200,
                ,fold_column=setFoldName      #10 folds CV
                ,stopping_metric ="AUC"
                ,stopping_tolerance=0.005
                ,stopping_rounds =3

);

#get a list of mean AUC of 10 folds CV  of all models
automlMaxAuc=0
automlAuc=c()
for(i in 1:nrow(testobj@leaderboard)){

  modelname=testobj@leaderboard[i,1]

  if(length( unlist(strsplit(x=modelname,split="Ensemble"))) ==1 ){

    thismodel=h2o.getModel(modelname)

    tempaaaa=as.numeric(thismodel@model$cross_validation_metrics_summary[2,1])
    automlAuc=rbind(automlAuc,c(modelname,tempaaaa))
    if(tempaaaa>automlMaxAuc){
      h2omethod=thismodel
      automlMaxAuc=tempaaaa
    }

  }

}

}#for

#list of mean AUC of 10 folds CV
automlAuc=as.data.frame(automlAuc)

```

#bestAUC:automlMaxAuc
