# Supplementary material for: Machine Learning Analysis of Image Data Based on Detailed MR Image Reports for Nasopharyngeal Carcinoma Prognosis
Source: Biomed Res Int. 2020 Feb 21;2020:8068913. doi: 10.1155/2020/8068913 (PMC7054759; doi:10.1155/2020/8068913)
Supplement: Supplementary Materials — Supplementary material 1: the detailed hyperparameter setting and grid search are shown. Supplementary material 2: the demo R code is demonstrated. [file 8068913.f1.zip]

Archive with 2 entries (2 files):
- 8068913.f1/Supplementary material 1.docx
- 8068913.f1/Supplementary material 2. demo_code_automl.pdf
